# Supplementary material for: Long-Term Longitudinal Evaluation of Six Commercial Immunoassays for the Detection of IgM and IgG Antibodies against SARS CoV-2
Source: MDPI journal article supplement (doi:10.3390/v13071244), 2021-06-26
Supplement: s1 [file s1]

|                                |                  |                   | Intervals of time post symptoms-onset (days) |                 |                  |                  |                  |                  |                 |
|--------------------------------|------------------|-------------------|----------------------------------------------|-----------------|------------------|------------------|------------------|------------------|-----------------|
|                                | Disease severity | Number of samples | D 0-5<br>N (%)                               | D 6-10<br>N (%) | D 11-15<br>N (%) | D 16-20<br>N (%) | D 21-30<br>N (%) | D 31-90<br>N (%) | D ≥ 91<br>N (%) |
| CLIA IgG antiS1/S2<br>DiaSorin | Mild             | 236               | 1 (0.4)                                      | 6 (2.5)         | 18 (7.6)         | 25 (10.5)        | 16 (6.7)         | 49 (20.7)        | 23 (9.7)        |
|                                | Moderate         | 203               | 2 (0.9)                                      | 11 (5.4)        | 28 (13.7)        | 30 (14.7)        | 20 (9.8)         | 39 (19.2)        | 28 (13.7)       |
|                                | Severe           | 133               | 3 (2.2)                                      | 5 (3.7)         | 18 (13.5)        | 16 (12)          | 19 (14.2)        | 27 (20.3)        | 18 (13.5)       |
| CMIA IgG anti NP<br>Abbott     | Mild             | 221               | 3 (1.3)                                      | 10 (4.5)        | 26 (11.7)        | 28 (12.6)        | 18 (8.1)         | 44 (19.9)        | 11 (4.9)        |
|                                | Moderate         | 184               | 3 (1.6)                                      | 11 (5.9)        | 27 (14.6)        | 28 (15.2)        | 20 (10.8)        | 34 (18.4)        | 12 (6.5)        |
|                                | Severe           | 123               | 2 (1.6)                                      | 6 (4.8)         | 19 (15.4)        | 16 (13)          | 19 (15.4)        | 25 (20.3)        | 10 (8.1)        |
| ELISA IgG anti NP<br>Epitope   | Mild             | 221               | 4 (1.8)                                      | 9 (4)           | 23 (10.4)        | 23 (10.4)        | 14 (6.3)         | 33 (14.9)        | 6 (2.7)         |
|                                | Moderate         | 184               | 3 (1.6)                                      | 13 (7)          | 27 (14.6)        | 26 (14.1)        | 21 (11.4)        | 32 (17.3)        | 11 (5.9)        |
|                                | Severe           | 123               | 3 (2.4)                                      | 9 (7.3)         | 18 (14.6)        | 16 (13)          | 19 (15.4)        | 25 (20.3)        | 8 (6.5)         |
| ECLIA total anti NP<br>Roche   | Mild             | 236               | 3 (1.2)                                      | 9 (3.8)         | 21 (8.8)         | 27 (11.4)        | 17 (7.2)         | 54 (22.8)        | 24 (10.1)       |
|                                | Moderate         | 203               | 3 (1.4)                                      | 12 (5.9)        | 26 (12.8)        | 29 (14.2)        | 18 (8.8)         | 38 (18.7)        | 28 (13.7)       |
|                                | Severe           | 133               | 1 (0.7)                                      | 8 (6)           | 18 (13.5)        | 15 (11.2)        | 19 (14.2)        | 27 (20.3)        | 19 (14.2)       |
| CMIA IgM anti NP<br>Abbott     | Mild             | 221               | 7 (3.1)                                      | 21 (9.5)        | 32 (14.4)        | 29 (13.1)        | 16 (7.2)         | 40 (18.1)        | 9 (4)           |
|                                | Moderate         | 184               | 3 (1.6)                                      | 18 (9.7)        | 32 (17.3)        | 29 (15.7)        | 22 (11.9)        | 27 (14.6)        | 6 (3.2)         |
|                                | Severe           | 123               | 3 (2.4)                                      | 15 (12.2)       | 19 (15.4)        | 16 (13)          | 19 (15.4)        | 22 (17.8)        | 9 (7.3)         |
| ELISA IgM anti NP<br>Epitope   | Mild             | 221               | 1 (0.4)                                      | 5 (2.2)         | 13 (5.8)         | 6 (2.7)          | 6 (2.7)          | 4 (1.8)          | 1 (0.4)         |
|                                | Moderate         | 184               | 3 (1.6)                                      | 11 (5.9)        | 22 (11.9)        | 11 (5.9)         | 7 (3.8)          | 4 (2.1)          | 1 (0.5)         |
|                                | Severe           | 123               | 2 (1.6)                                      | 5 (4)           | 16 (13)          | 14 (11.3)        | 12 (9.7)         | 5 (4)            | 0 (0)           |

Table S1: Samples used to assess the variation in antibodies kinetics (timing and duration) by disease severity

|                                           | <b>Day 0-5</b> | <b>Day 0-10</b> | <b>Day 0-15</b> | <b>Day 0-20</b> | <b>Day 0-30</b> | <b>Day 0-90</b> | <b>Day &gt;90</b> |
|-------------------------------------------|----------------|-----------------|-----------------|-----------------|-----------------|-----------------|-------------------|
| CLIA IgG<br>antiS1/S2<br><b>DiaSorin</b>  | 0.25           | 0.19            | 0.01            | 0.11            | <0.01           | <0.01           | <0.01             |
| CMIA IgG<br>anti NP<br><b>Abbott</b>      | 0.96           | 0.78            | 0.44            | 0.30            | 0.047           | 0.047           | <0.01             |
| ELISA IgG<br>anti NP<br><b>Epitope</b>    | 0.87           | 0.36            | 0.10            | 0.03            | <0.01           | <0.01           | <0.01             |
| ECLIA<br>total anti<br>NP<br><b>Roche</b> | 0.83           | 0.59            | 0.15            | 0.10            | 0.016           | 0.10            | <0.01             |
| CMIA IgM<br>anti NP<br><b>Abbott</b>      | 0.10           | 0.70            | 0.83            | 0.67            | 0.07            | 0.10            | 0.01              |
| ELISA IgM<br>anti NP<br><b>Epitope</b>    | 0.45           | 0.07            | <0.01           | <0.01           | <0.01           | <0.01           | <0.01             |

Table S2 – p values for the assays seropositivity according to the severity of the disease and for specific time points
